# Supplementary material for: Fermentation of Whole Grain Sorghum (Sorghum bicolor (L.) Moench) with Different Dry Matter Concentrations: Effect on the Apparent Total Tract Digestibility of Energy, Crude Nutrients and Minerals in Growing Pigs
Source: MDPI journal article supplement (doi:10.3390/ani11051199), 2021-04-22
Supplement: s1 [file s1]

## Article

# Fermentation of Whole Grain Sorghum (*Sorghum bicolor* (L.) Moench) with Different Dry Matter Concentrations: Effect on the Apparent Total Tract Digestibility of Energy, Crude Nutrients and Minerals in Growing Pigs

Reinhard Puntigam <sup>1,\*</sup>, Julia Slama <sup>1</sup>, Daniel Brugger <sup>2</sup>, Karin Leitner <sup>3</sup>, Karl Schedle <sup>3</sup>, Gabriela Wetscherek-Seipelt <sup>3</sup> and Wolfgang Wetscherek <sup>3</sup>

**Table S1.** Effects of sorghum conserves with varying dry matter concentration (701, 738 and 809 g kg<sup>-1</sup>) on zootechnical performance in diets for growing pigs.

| Item                    | Experimental Group |       |       | SEM  | <i>p</i> -Value<br>Treat |
|-------------------------|--------------------|-------|-------|------|--------------------------|
|                         | S1                 | S2    | S3    |      |                          |
| ADG, g d <sup>-1</sup>  | 426.9              | 456.5 | 447.2 | 23.3 | 0.529                    |
| F:G, g kg <sup>-1</sup> | 3.33               | 2.86  | 2.66  | 0.30 | 0.201                    |

S1, 701 g kg<sup>-1</sup> DM; S2, 738 g kg<sup>-1</sup> DM; S3, 809 g kg<sup>-1</sup> DM; SEM, Standard error of means.
